# Supplementary material for: Dose-dependent action of the RNA binding protein FOX-1 to relay X-chromosome number and determine C. elegans sex
Source: eLife journal article supplement (doi:10.7554/elife.62963), 2020-12-29
Supplement: supp [file elife-62963-supp-v2.zip]

Figure 6—figure supplement 1

|   |                        | XX Hermaphrodite          | XX Hermaphrodite<br>with <i>sex-1(RNAi)</i> |
|---|------------------------|---------------------------|---------------------------------------------|
|   |                        | Avg. Brood Size $\pm$ SEM | Avg. Brood Size $\pm$ SEM                   |
|   |                        | Broods (Total Embryos)    | Broods (Total Embryos)                      |
| A | WT                     | 267 $\pm$ 32<br>6 (1602)  | 172 $\pm$ 42<br>8 (1378)                    |
| B | <i>fox-1</i><br>(y793) | 294 $\pm$ 15<br>6 (1767)  | 60 $\pm$ 14<br>9 (543)                      |
| C | <i>y810</i>            | 240 $\pm$ 24<br>6 (1440)  | 4 $\pm$ 1<br>8 (31)                         |
| D | <i>y805</i>            | 278 $\pm$ 15<br>6 (1668)  | 1 $\pm$ 1<br>7 (7)                          |
| E | <i>y804</i>            | 252 $\pm$ 41<br>5 (1260)  | 11 $\pm$ 4<br>8 (84)                        |
| F | <i>y808</i>            | 274 $\pm$ 26<br>5 (1370)  | 102 $\pm$ 18<br>20 (2044)                   |
| G | <i>y809</i>            | 281 $\pm$ 37<br>6 (1686)  | 111 $\pm$ 11<br>14 (1557)                   |
| H | <i>y807</i>            | 273 $\pm$ 12<br>6 (1638)  | 206 $\pm$ 21<br>5 (1031)                    |
| I | <i>y806</i>            | 282 $\pm$ 41<br>6 (1692)  | 193 $\pm$ 8<br>7 (1352)                     |
| J | <i>y811</i>            | 300 $\pm$ 22<br>4 (1200)  | 161 $\pm$ 43<br>10 (1607)                   |
| K | <i>y803</i>            | 264 $\pm$ 44<br>6 (1584)  | 100 $\pm$ 25<br>8 (798)                     |
| L | <i>y820</i>            | 277 $\pm$ 14<br>4 (1109)  | 278 $\pm$ 31<br>4 (1113)                    |
