# Supplementary figures and images for: Dose-dependent action of the RNA binding protein FOX-1 to relay X-chromosome number and determine C. elegans sex
Source: eLife journal article supplement (doi:10.7554/elife.62963), 2020-12-29

Figure 6—figure supplement 2

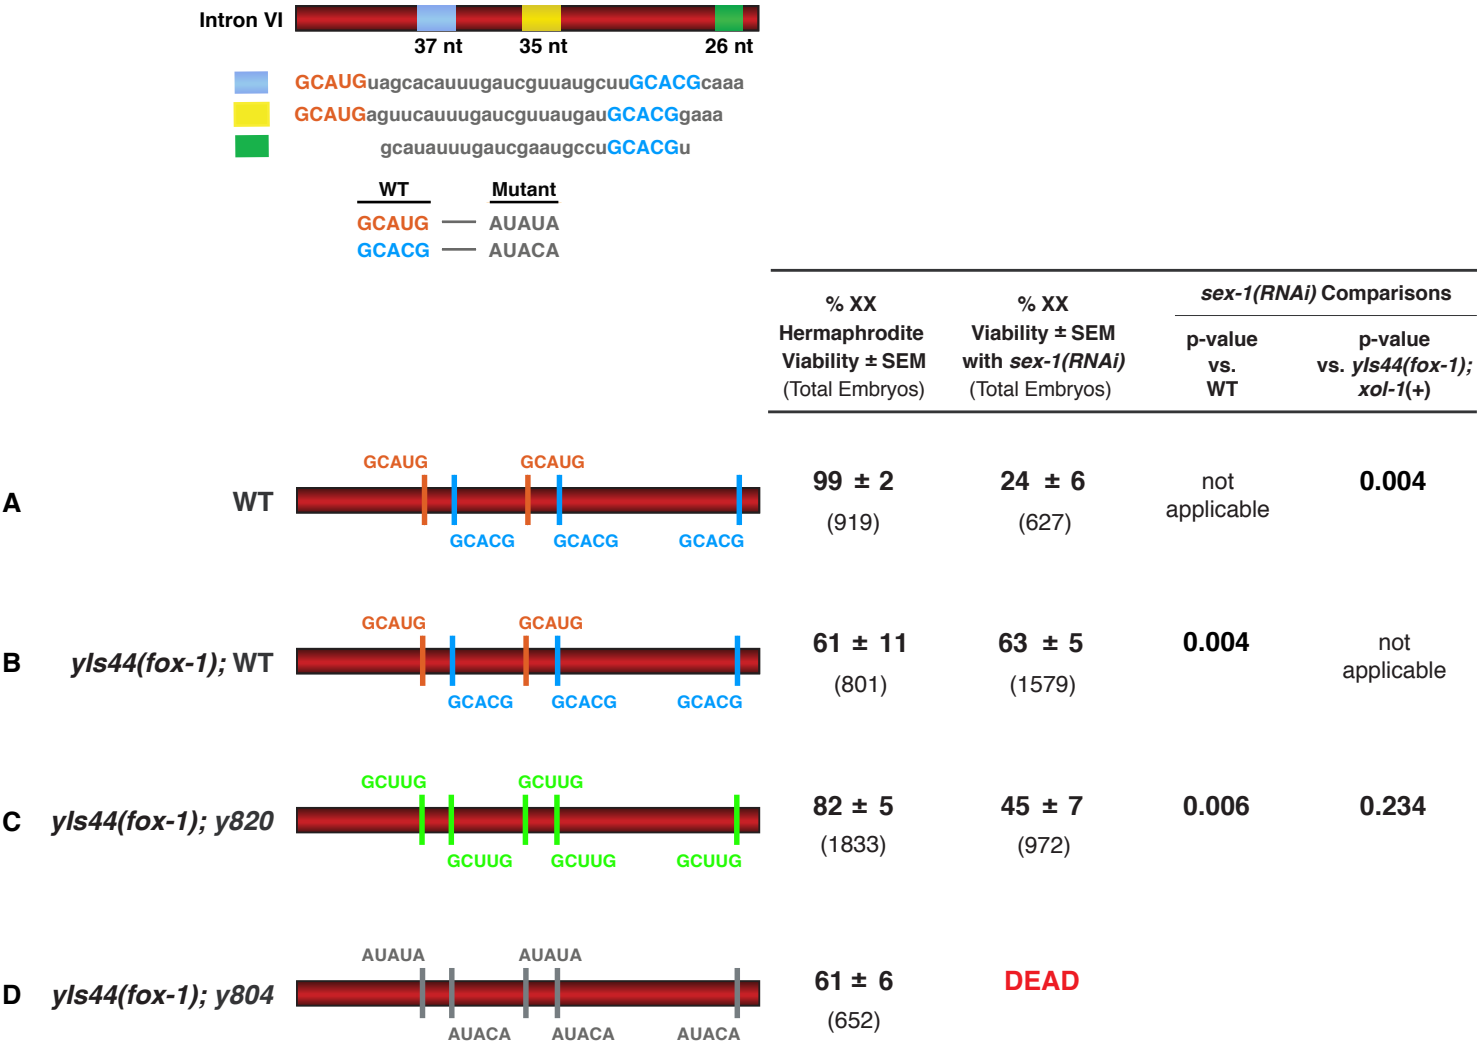

Supplement: supp [file elife-62963-supp-v2.zip]

Figure 3—figure supplement 1

A *xol-1* introns and exons

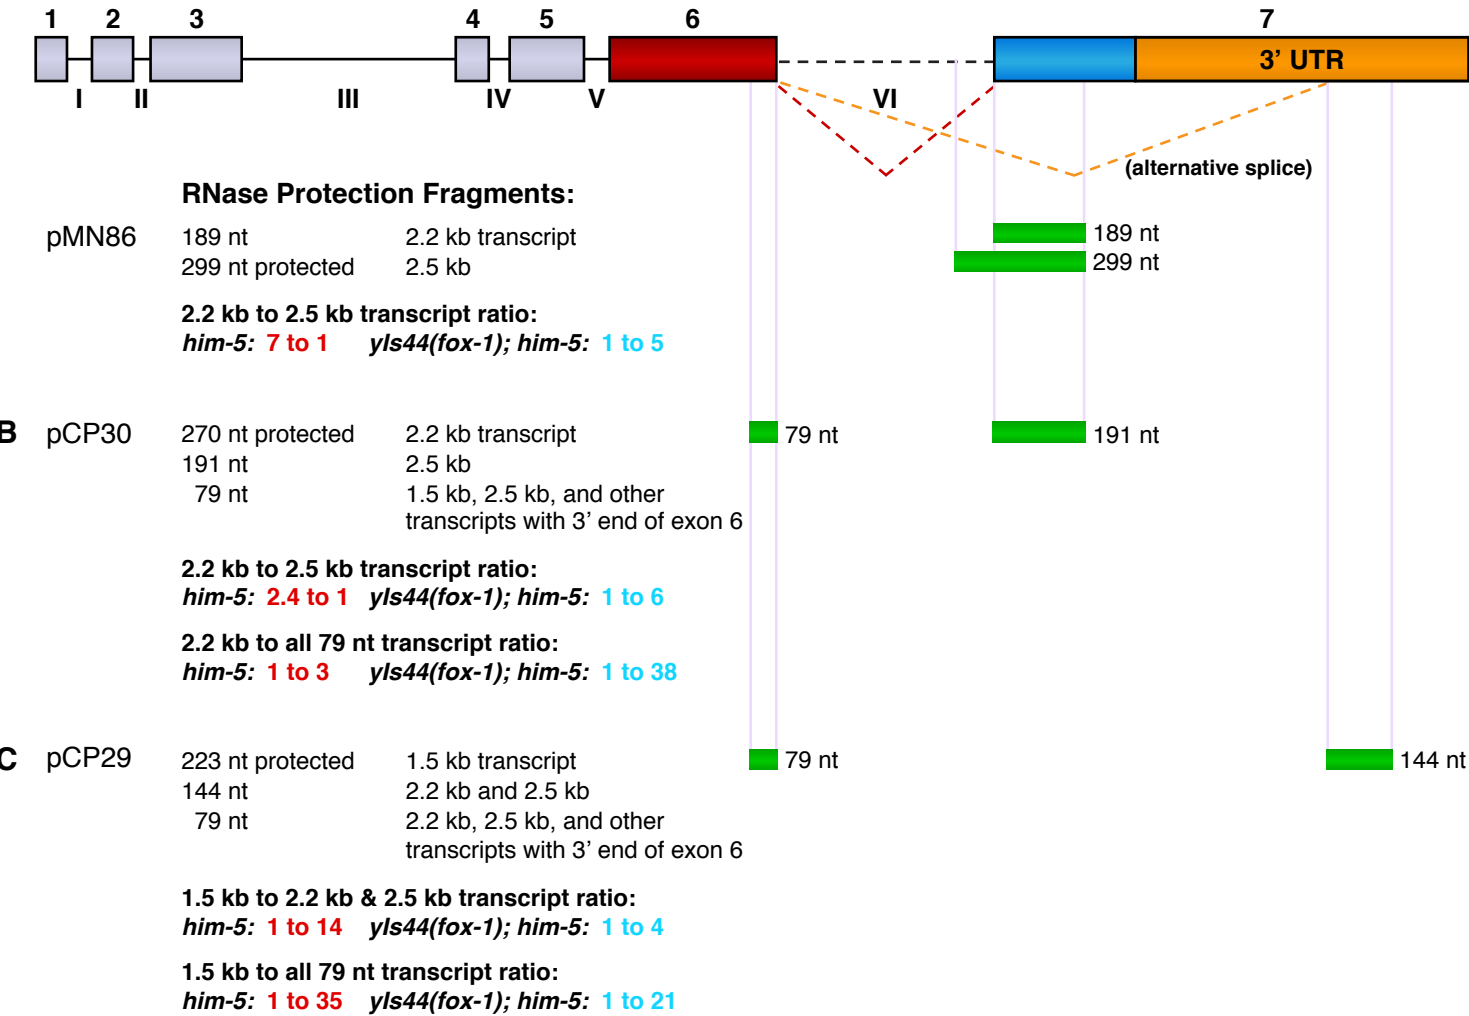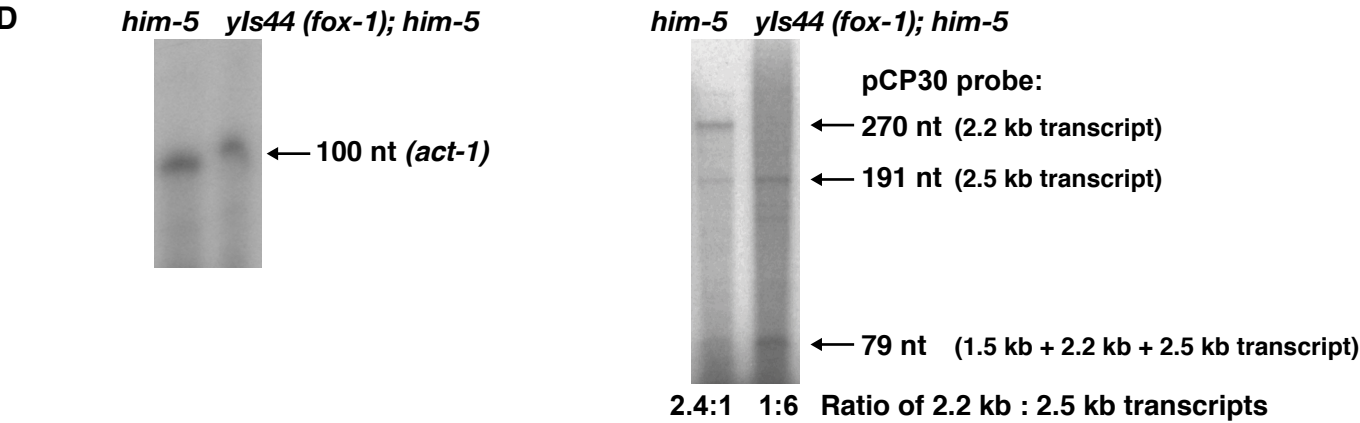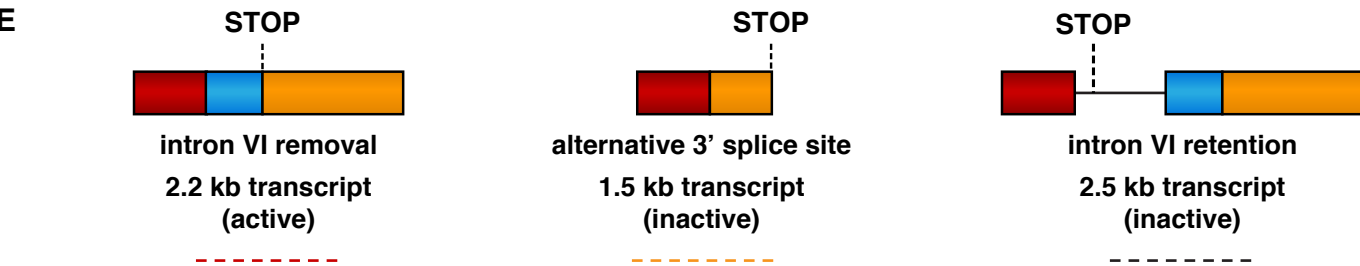

Supplement: supp [file elife-62963-supp-v2.zip]
